# Supplementary material for: A scalable serology solution for profiling humoral immune responses to SARS‐CoV‐2 infection and vaccination
Source: PubMed Central journal article supplement — Clin Transl Immunology. 2022 Mar 23;11(3):e1380. doi: 10.1002/cti2.1380 (PMC8942165; doi:10.1002/cti2.1380), 2022-03-23
Supplement: CTI2-11-e1380-s002.pdf [file CTI2-11-e1380-s002.pdf]

**Supplementary table 1.** Reagent information.

| <b>Protein</b>      | <b>Protein type</b>          | <b>Expression mode</b> | <b>Typical purified yield (mg L<sup>-1</sup>)</b> | <b>% Main peak purity by SEC</b> |
|---------------------|------------------------------|------------------------|---------------------------------------------------|----------------------------------|
| spike (SMT1)        | 570 kDa trimer               | CHO stable pool        | 370                                               | 97                               |
| RBD (331–521)       | 37 kDa monomer               | CHO transient          | 25                                                | 98                               |
| RBD (319–541)       | 37 kDa monomer               | CHO transient          | 30                                                | 96                               |
| nucleocapsid (NCAP) | 300 kDa hexamer <sup>†</sup> | CHO transient          | 60                                                | 99                               |
| VHH72-hFc1X7        | 100 kDa dimer                | CHO transient          | 250                                               | 98                               |
| NRCov2-04-hFc1X7    | 90 kDa dimer                 | CHO transient          | 100                                               | 91                               |
| NRCov2-20-hFc1X7    | 100 kDa dimer                | CHO transient          | 250                                               | 98                               |
| IgG#5-HRP           | 270 kDa mAb                  | CHO transient          | 15                                                | 60                               |
| ACE2-BAP            | 90 kDa monomer               | CHO transient          | 150                                               | 99                               |

<sup>†</sup>Hexamer predicted based on HPLC-SEC elution volume.

**Supplementary table 2.** Comparison of manual and automated ELISAs.

| Reagent                                                                                                     | Manual ELISA (96-well colorimetric)                      |                                                                                              | Automated ELISA (384-well chemiluminescent)                                                                                                |                                                                                                     |
|-------------------------------------------------------------------------------------------------------------|----------------------------------------------------------|----------------------------------------------------------------------------------------------|--------------------------------------------------------------------------------------------------------------------------------------------|-----------------------------------------------------------------------------------------------------|
|                                                                                                             | Toronto                                                  | Ottawa                                                                                       | Toronto                                                                                                                                    | Ottawa                                                                                              |
| <b>Antibody detection ELISA</b>                                                                             |                                                          |                                                                                              |                                                                                                                                            |                                                                                                     |
| spike                                                                                                       | 200 ng/well                                              | 100 ng/well                                                                                  | 50 ng/well                                                                                                                                 | 50 ng/well                                                                                          |
| RBD (331–521)                                                                                               | 75 ng/well                                               | N/A                                                                                          | 20 ng/well                                                                                                                                 | N/A                                                                                                 |
| RBD (319–541)                                                                                               | 75 ng/well                                               | 100 ng/well                                                                                  | 20 ng/well                                                                                                                                 | 50 ng/well                                                                                          |
| N                                                                                                           | 25 ng/well                                               | 100 ng/well                                                                                  | 7 ng/well                                                                                                                                  | 50 ng/well                                                                                          |
| spike/RBD control antibody (Toronto: VHH72-hFc1X7 for IgG, hIGM2001 to IgM, CR3022 for IgA, Ottawa: CR3022) | 8-point curve of 2-fold dilutions starting at 10 ng/well | 10-point curve of 2-fold dilutions starting at 25 ng/well for IgM/IgA and 20 ng/well for IgG | 8-point curve of 4-fold dilutions starting at 10 ng/well for IgG/IgA; 20 ng/well, 10 ng, then an 8-point curve of 4-fold dilutions for IgM | 8-point curve of 2-fold dilutions starting at 5 ng/well, 4-fold dilutions starting at 0.039 ng/well |
| N control antibody (HC2003 for IgG, CR3018 for IgM and IgA)                                                 | 8-point curve of 2-fold dilutions starting at 10 ng/well | N/A                                                                                          | 20 ng/well, 10 ng/well, then an 8-point curve of 4-fold dilutions                                                                          | 8-point curve of 2-fold dilutions starting at 5 ng/well, 4-fold dilutions starting at 0.039 ng/well |
| IgG#5-HRP                                                                                                   | 3 ng/well (1:10K)                                        | 10 ng/well (1:3K)                                                                            | 0.9 ng/well (1:6.7K)                                                                                                                       | 1.1 ng/well (1:5.4K)                                                                                |
| Anti-IgA-HRP                                                                                                | 2 ng/well (1:20K)                                        | 13 ng/well (1:3K)                                                                            | 0.8 ng/well (1:10K)                                                                                                                        | 1 ng/well (1:8K)                                                                                    |
| Anti-IgM-HRP                                                                                                | 0.67 ng/well (1:60K)                                     | 13 ng/well (1:3K)                                                                            | 0.66 ng/well (1:12K)                                                                                                                       | 0.83 ng/well (1:9.6K)                                                                               |
| Substrate                                                                                                   | 50 µL TMB/50 µL sulphuric acid                           | 100 µL OPD/50 µL 3 M hydrochloric acid                                                       | 1:4 dilution of ELISA Pico                                                                                                                 | 1:2 dilution of ELISA Pico                                                                          |
| <b>snELISA</b>                                                                                              |                                                          |                                                                                              |                                                                                                                                            |                                                                                                     |
| spike                                                                                                       | 200 ng/well                                              | N/A                                                                                          | 50 ng/well                                                                                                                                 | 100 ng/well                                                                                         |
| RBD (319–541)                                                                                               | 100 ng/well                                              | N/A                                                                                          | 34 ng/well                                                                                                                                 | 100 ng/well                                                                                         |
| ACE2-BAP                                                                                                    | 6.25 ng/well                                             | N/A                                                                                          | 2.08 ng/well (NRC), 17 ng/well (Rini)                                                                                                      | 6.5 ng/well                                                                                         |
| Streptavidin-HRP                                                                                            | 25 (1:2K) ng/well                                        | N/A                                                                                          | 15 ng/well                                                                                                                                 | 25 ng/well                                                                                          |
| Substrate                                                                                                   | 50 µL TMB/50 µL sulphuric acid                           | N/A                                                                                          | 1:4 dilution of ELISA Pico                                                                                                                 | 1:2 dilution of ELISA Pico                                                                          |

**Supplementary table 3.** ELISA performance statistics for plasma or serum IgA and IgM (Toronto).

|                                                       | spike |       | RBD   |       | N     |       | ≥ 2 positive antigens |       |
|-------------------------------------------------------|-------|-------|-------|-------|-------|-------|-----------------------|-------|
|                                                       | IgA   | IgM   | IgA   | IgM   | IgA   | IgM   | IgA                   | IgM   |
| <b>ROC analysis</b>                                   |       |       |       |       |       |       |                       |       |
| <b>AUC</b>                                            | 0.982 | 0.949 | 0.978 | 0.955 | 0.954 | 0.759 | N/A                   | N/A   |
| <b>Cut point</b>                                      | 0.079 | 0.460 | 0.060 | 0.083 | 0.209 | 0.074 | N/A                   | N/A   |
| <b>FPR</b>                                            | 0.017 | 0.017 | 0.017 | 0.017 | 0.017 | 0.017 | 0.000                 | 0.000 |
| <b>TPR</b>                                            | 0.967 | 0.800 | 0.917 | 0.833 | 0.767 | 0.333 | 0.917                 | 0.767 |
| <b>3 SDs from the mean of the negative controls</b>   |       |       |       |       |       |       |                       |       |
| <b>Cut point</b>                                      | 0.198 | 0.450 | 0.127 | 0.133 | 0.268 | 0.120 | N/A                   | N/A   |
| <b>FPR</b>                                            | 0.000 | 0.017 | 0.000 | 0.000 | 0.000 | 0.000 | 0.000                 | 0.000 |
| <b>TPR</b>                                            | 0.933 | 0.800 | 0.833 | 0.733 | 0.750 | 0.217 | 0.883                 | 0.733 |
| <b>Samples used to assess performance<sup>†</sup></b> |       |       |       |       |       |       |                       |       |
| Patients with COVID-19 20–40 d post-symptom onset     |       |       |       |       |       | 60    |                       |       |
| Pre-COVID-19 (negative) controls                      |       |       |       |       |       | 60    |                       |       |

<sup>†</sup>NML panel 4. Each sample was analyzed in duplicate (the unique numbers of samples are shown). Replicates were treated as separate samples in the ROC analysis. Negative samples were excluded from the analysis if the replicates were > 4 SDs from the mean.

**Supplementary table 4.** Conversion of relative ratios to international units (BAU mL<sup>-1</sup>) for plasma or serum.

| Nucleocapsid <sup>†</sup>                                                                                                                                                                                                                                                                                                                                                                       |                       |                                          |                      |                                          |                      |                             |
|-------------------------------------------------------------------------------------------------------------------------------------------------------------------------------------------------------------------------------------------------------------------------------------------------------------------------------------------------------------------------------------------------|-----------------------|------------------------------------------|----------------------|------------------------------------------|----------------------|-----------------------------|
| Dilution fold (d)                                                                                                                                                                                                                                                                                                                                                                               |                       | 160                                      |                      | 2560                                     |                      | Note                        |
| Volume equivalent (μL)                                                                                                                                                                                                                                                                                                                                                                          |                       | 0.0625                                   |                      | 0.00391                                  |                      |                             |
| Relative Ratio (RR)                                                                                                                                                                                                                                                                                                                                                                             | log <sub>2</sub> (RR) | log <sub>2</sub> (BAU mL <sup>-1</sup> ) | BAU mL <sup>-1</sup> | log <sub>2</sub> (BAU mL <sup>-1</sup> ) | BAU mL <sup>-1</sup> |                             |
| 2                                                                                                                                                                                                                                                                                                                                                                                               | 1.0                   | 8.38                                     | 333.98               | 12.38                                    | 5,343.76             | Upper limit of linear range |
| 1                                                                                                                                                                                                                                                                                                                                                                                               | 0.0                   | 6.98                                     | 126.34               | 10.98                                    | 2,021.37             |                             |
| 0.5                                                                                                                                                                                                                                                                                                                                                                                             | -1.0                  | 5.58                                     | 47.79                | 9.58                                     | 764.62               |                             |
| 0.396                                                                                                                                                                                                                                                                                                                                                                                           | -1.3                  | 5.11                                     | 34.46                | 9.16                                     | 571.19               | Positivity Threshold        |
| 0.25                                                                                                                                                                                                                                                                                                                                                                                            | -2.0                  | 4.18                                     | 18.08                | 8.17                                     | 289.23               |                             |
| 0.125                                                                                                                                                                                                                                                                                                                                                                                           | -3.0                  | 2.77                                     | 6.84                 | 6.77                                     | 109.41               |                             |
| 0.0625                                                                                                                                                                                                                                                                                                                                                                                          | -4.0                  | 1.37                                     | 2.59                 | 5.37                                     | 41.38                | Lower Limit of linear range |
| <sup>†</sup> Formula: $\log_2(\text{BAU mL}^{-1} \text{ @ sample dilution fold } d) = (\log_2(\text{RR}) - 0.243) / 0.713 + \log_2(d)$ . See Figure 3D for a graph plotting the international standard curve used to calculate the conversion formula and its relationship to the reference curve. With standard 1:160 and 1:2560 dilutions, the range is 2.59 to 5343.8 BAU mL <sup>-1</sup> . |                       |                                          |                      |                                          |                      |                             |
| RBD <sup>‡</sup>                                                                                                                                                                                                                                                                                                                                                                                |                       |                                          |                      |                                          |                      |                             |
| Dilution fold (d)                                                                                                                                                                                                                                                                                                                                                                               |                       | 160                                      |                      | 2560                                     |                      | Note                        |
| Volume equivalent (μL)                                                                                                                                                                                                                                                                                                                                                                          |                       | 0.0625                                   |                      | 0.00391                                  |                      |                             |
| Relative Ratio (RR)                                                                                                                                                                                                                                                                                                                                                                             | log <sub>2</sub> (RR) | log <sub>2</sub> (BAU mL <sup>-1</sup> ) | BAU mL <sup>-1</sup> | log <sub>2</sub> (BAU mL <sup>-1</sup> ) | BAU mL <sup>-1</sup> |                             |
| 1                                                                                                                                                                                                                                                                                                                                                                                               | 0.0                   | 8.12                                     | 278.37               | 12.12                                    | 4,453.99             | Upper limit of linear range |
| 0.5                                                                                                                                                                                                                                                                                                                                                                                             | -1.0                  | 6.82                                     | 112.63               | 10.81                                    | 1,802.02             |                             |
| 0.25                                                                                                                                                                                                                                                                                                                                                                                            | -2.0                  | 5.51                                     | 45.57                | 9.51                                     | 729.07               |                             |
| 0.186                                                                                                                                                                                                                                                                                                                                                                                           | -2.4                  | 4.95                                     | 30.97                | 8.95                                     | 495.58               | Positivity Threshold        |
| 0.125                                                                                                                                                                                                                                                                                                                                                                                           | -3.0                  | 4.20                                     | 18.44                | 8.20                                     | 294.97               |                             |
| 0.0625                                                                                                                                                                                                                                                                                                                                                                                          | -4.0                  | 2.90                                     | 7.46                 | 6.90                                     | 119.34               |                             |
| 0.03125                                                                                                                                                                                                                                                                                                                                                                                         | -5.0                  | 1.59                                     | 3.02                 | 5.59                                     | 48.28                | Lower Limit of linear range |
| <sup>‡</sup> Formula: $\log_2(\text{BAU mL}^{-1} \text{ @ sample dilution fold } d) = (\log_2(\text{RR}) + 0.612) / 0.766 + \log_2(d)$ . With standard 1:160 and 1:2560 dilutions, the range is 3.02 to 4,449.72 BAU mL <sup>-1</sup> .                                                                                                                                                         |                       |                                          |                      |                                          |                      |                             |

| Spike <sup>§</sup>     |                       |                                          |                      |                                          |                      |                             |
|------------------------|-----------------------|------------------------------------------|----------------------|------------------------------------------|----------------------|-----------------------------|
| Dilution fold (d)      |                       | 160                                      |                      | 2560                                     |                      | Note                        |
| Volume equivalent (μL) |                       | 0.0625                                   |                      | 0.00391                                  |                      |                             |
| Relative Ratio (RR)    | log <sub>2</sub> (RR) | log <sub>2</sub> (BAU mL <sup>-1</sup> ) | BAU mL <sup>-1</sup> | log <sub>2</sub> (BAU mL <sup>-1</sup> ) | BAU mL <sup>-1</sup> |                             |
| 1                      | 0.0                   | 6.55                                     | 93.80                | 10.55                                    | 1,500.80             | Upper limit of linear range |
| 0.5                    | -1.0                  | 5.28                                     | 38.75                | 9.27                                     | 619.95               |                             |
| 0.25                   | -2.0                  | 4.00                                     | 16.01                | 8.00                                     | 256.09               |                             |
| 0.19                   | -2.4                  | 3.50                                     | 11.28                | 7.49                                     | 180.45               | Positivity Threshold        |
| 0.125                  | -3.0                  | 2.72                                     | 6.61                 | 6.72                                     | 105.78               |                             |
| 0.0625                 | -4.0                  | 1.45                                     | 2.73                 | 5.45                                     | 43.70                |                             |
| 0.03125                | -5.0                  | 0.17                                     | 1.13                 | 4.17                                     | 18.05                | Lower Limit of linear range |

<sup>§</sup>Formula:  $\log_2(\text{BAU mL}^{-1} \text{ @ sample dilution fold } d) = (\log_2(\text{RR}) - 0.604)/0.784 + \log_2(d)$ . With standard 1:160 and 1:2560 dilutions, the range is 1.13 to 1,500.80 BAU mL<sup>-1</sup>.
